# Supplementary material for: Unlocking the Circular Potential of Construction and Demolition Waste: A Pathway for Texas’ Construction Industry
Source: Research Square preprint supplement (doi:10.21203/rs.3.rs-8166632/v1), 2025-12-05
Supplement: Supplementary file 1 [file c17f8e10698f129e1e5ddcc2.docx]

**Supplemental Information**

**Unlocking the Circular Potential of Construction and Demolition Waste: A Pathway for Texas’ Construction Industry**

**Julie Ann Hartell Ph.D., Billy L. Jones, Ashrant Aryal Ph.D.**

**Department of Construction Science, Texas A&M University**

**789 Ross Street, College Station, TX**

**Corresponding Author: Dr. Julie Ann Hartell, julie.hartell@tamu.edu**

**TCEQ Regional Results for 500tpd, 1000 tpd and 1500 tpd scenarios.**


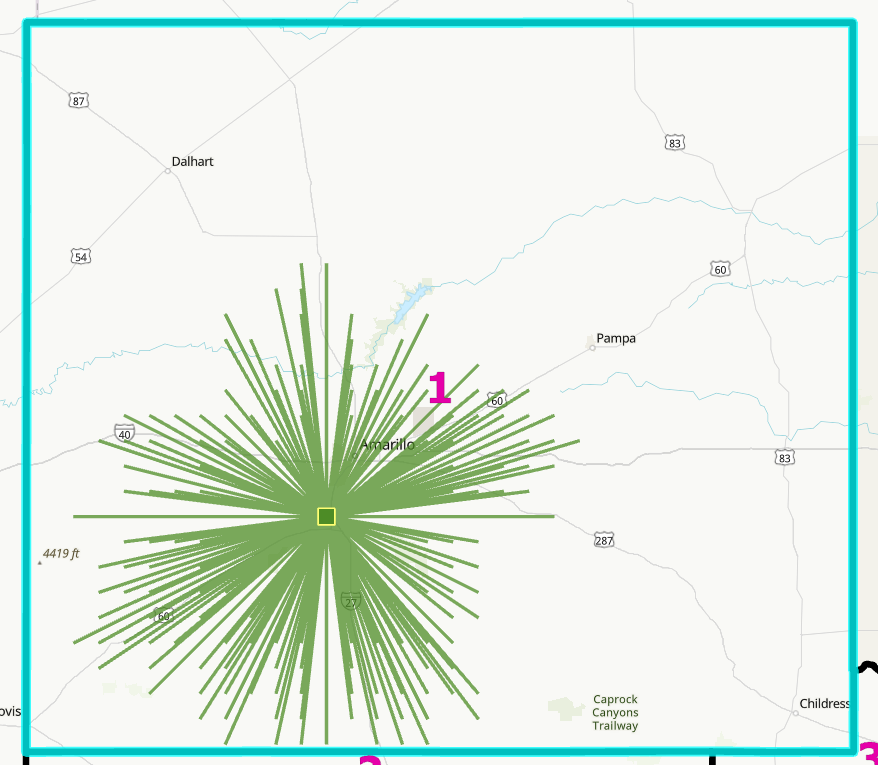


Figure A-1: TCEQ Region 1, 500/1,000/1,500 tpd facility scenarios, 1 candidate


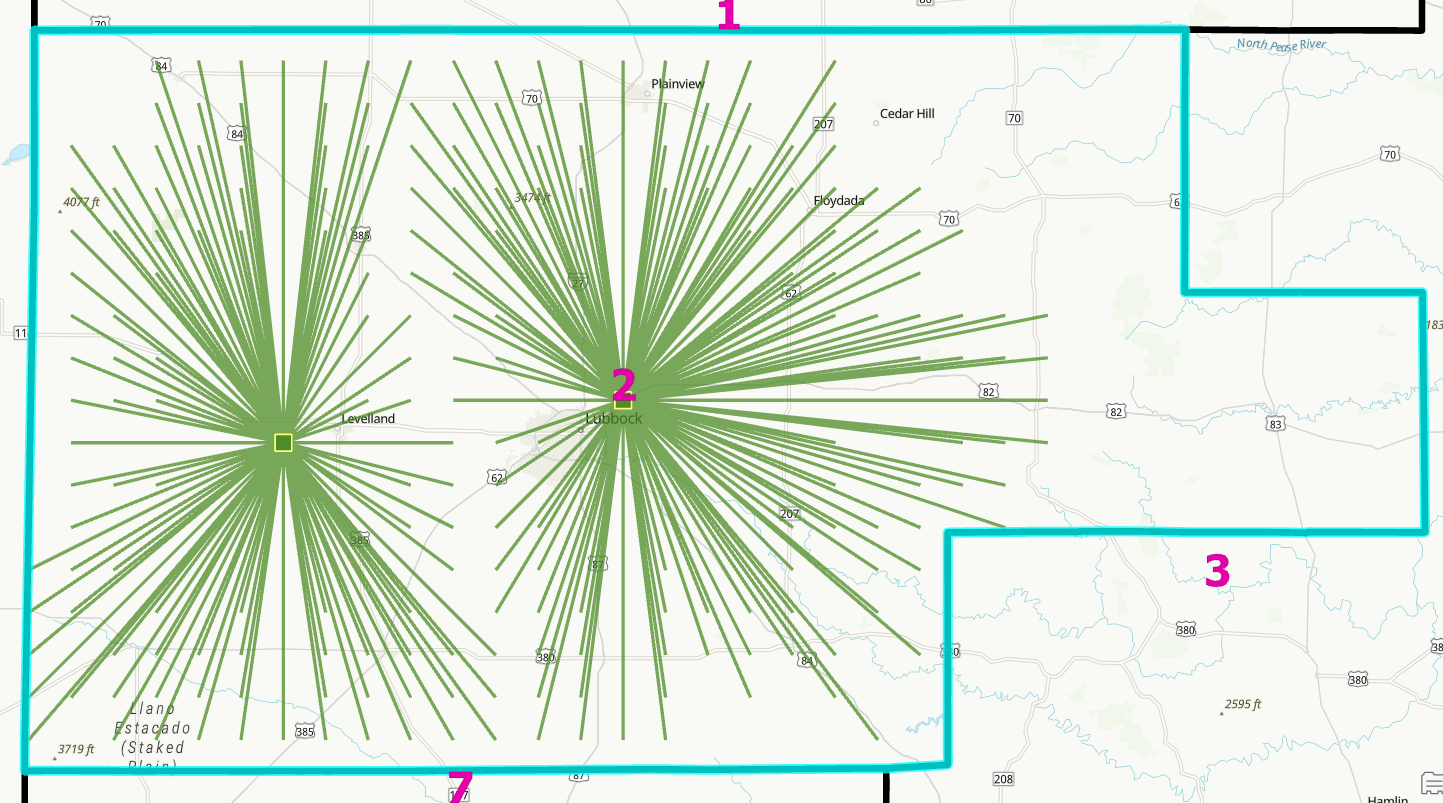


Figure A-2a: TCEQ region 2, 500 tpd facility scenario, 2 candidates


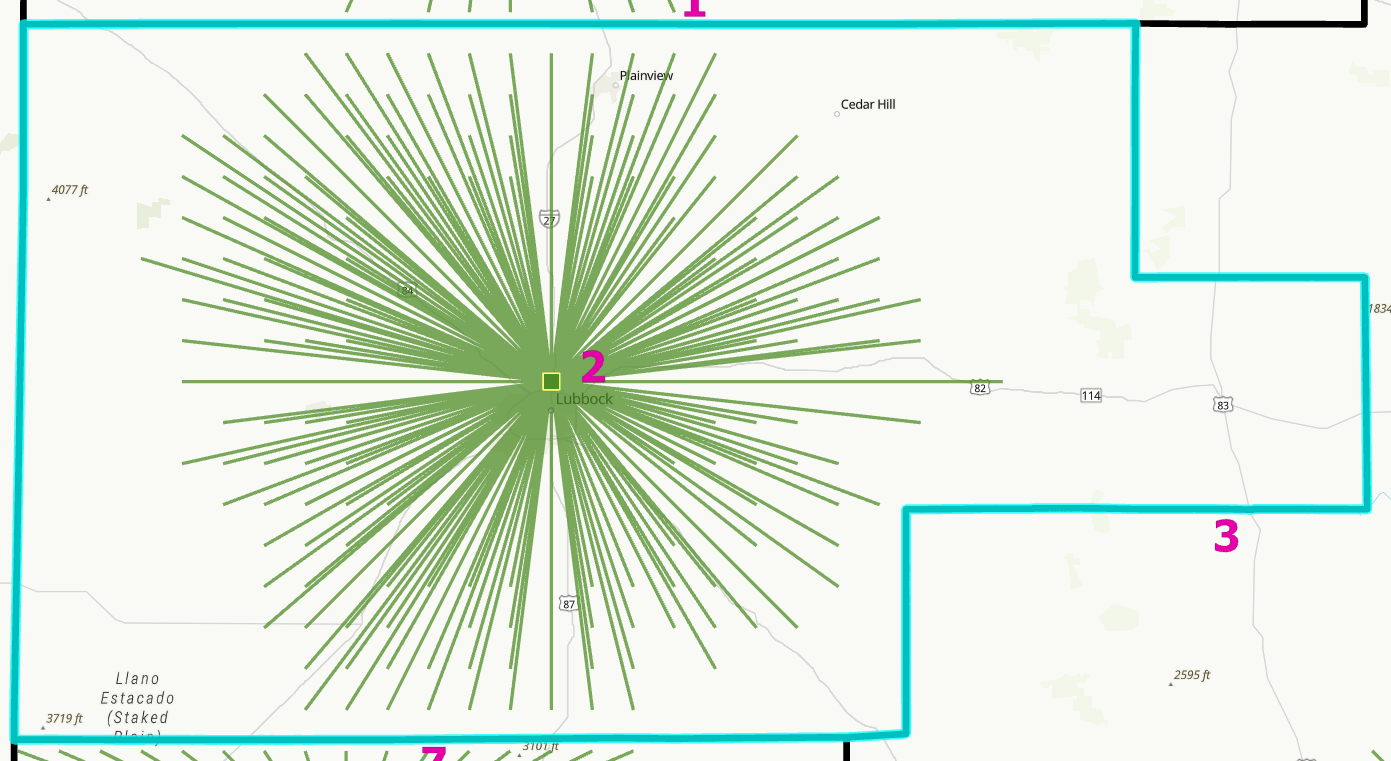


Figure A-2b: TCEQ region 2, 1,000/1,500 tpd facility scenario, 1 candidate


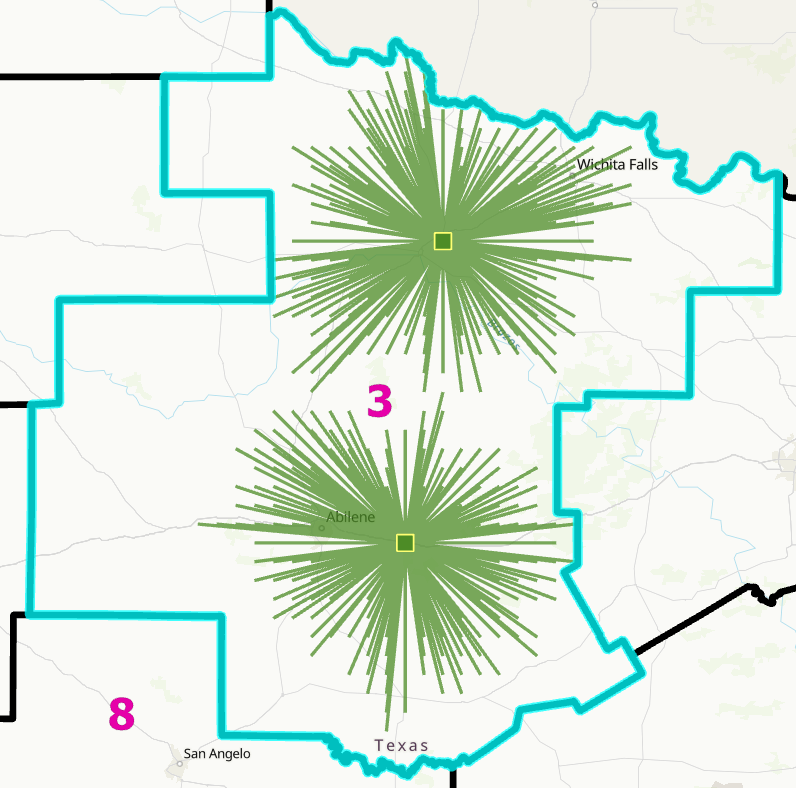


Figure A-3a: TCEQ region 3, 500 tpd facility scenario, 2 candidates


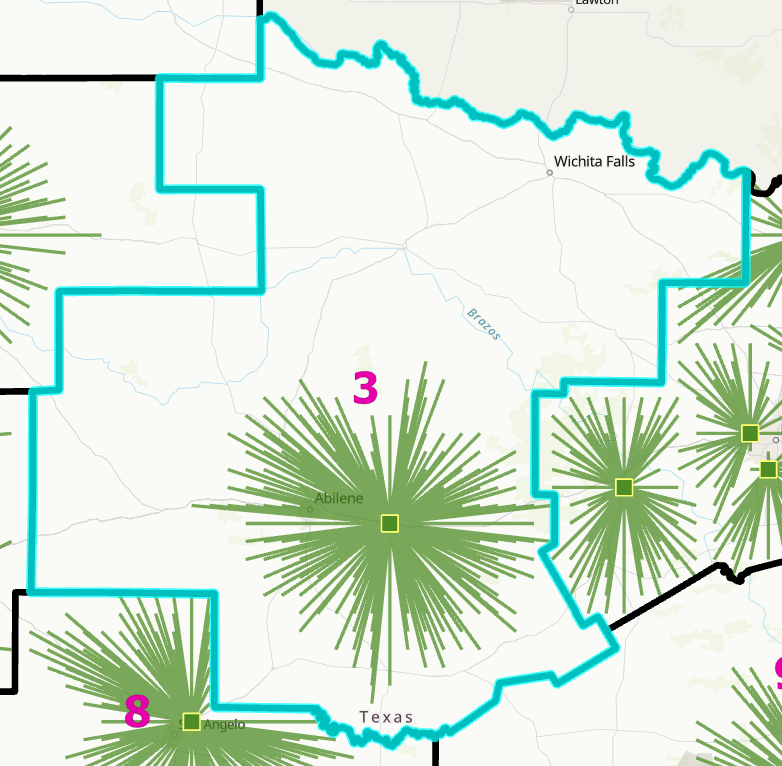


Figure A-3b: TCEQ region 3, 1,000/1,500 tpd facility scenario, 1 candidate


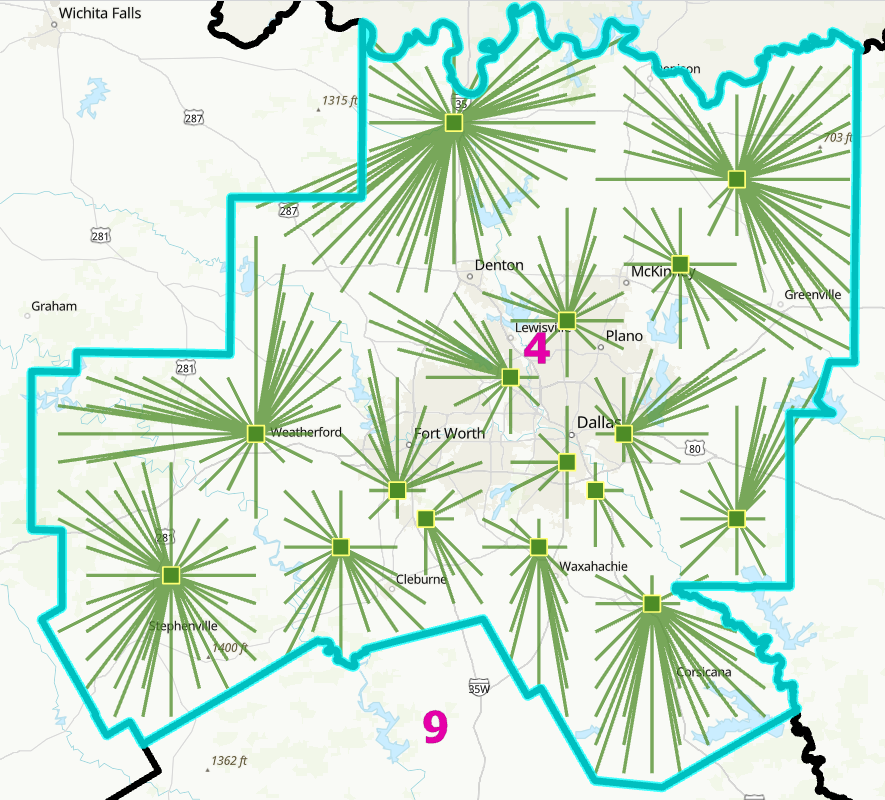


Figure A-4a: TCEQ region 4, 500 tpd facility scenario, 16 candidates


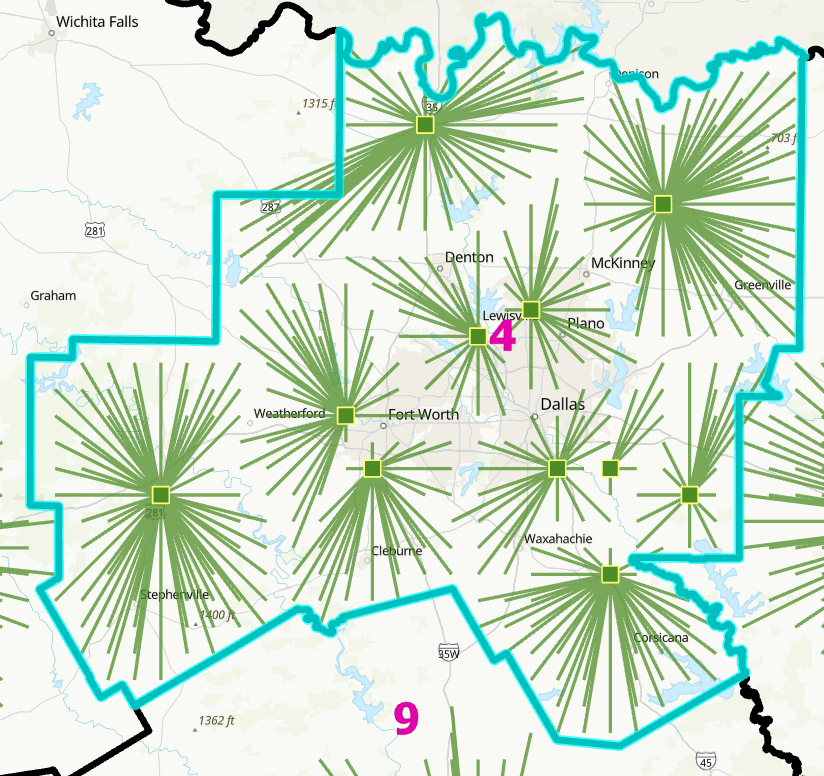


Figure A-4b: TCEQ region 4, 1,000 tpd facility scenario, 11 candidates


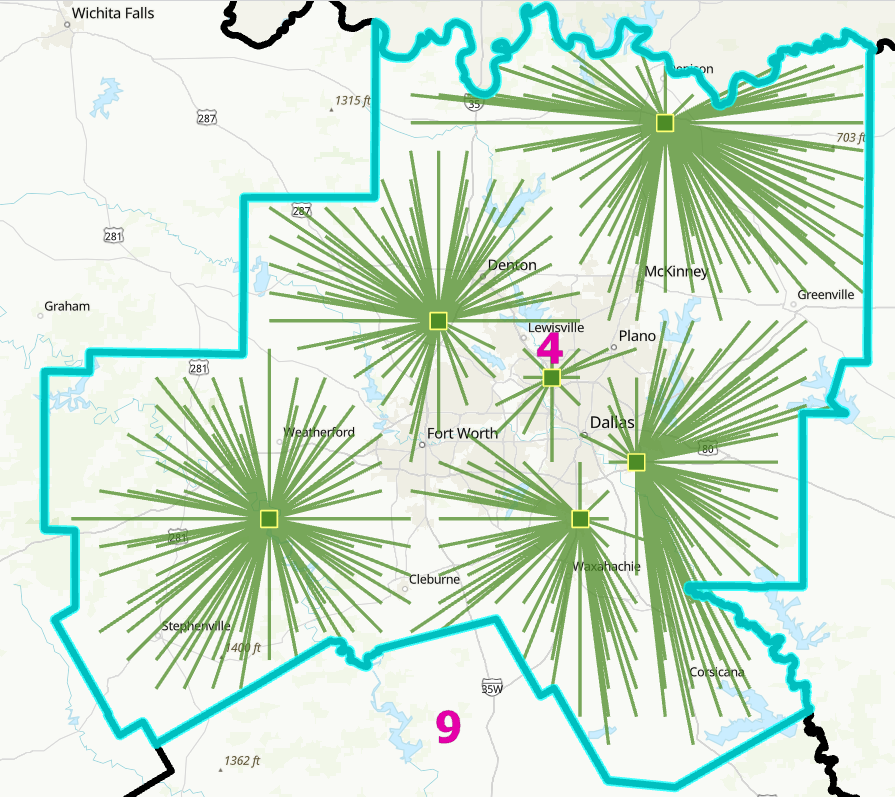


Figure A-4c: TCEQ region 4, 1,500 tpd facility scenario, 6 candidates


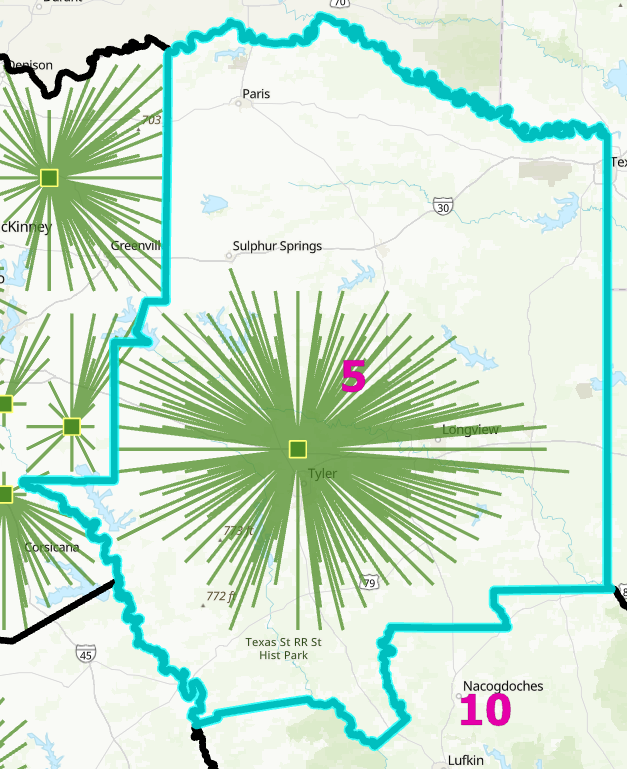


Figure A-5: TCEQ region 5, 500/1,000/1,500 tpd facility scenarios, 1 candidate


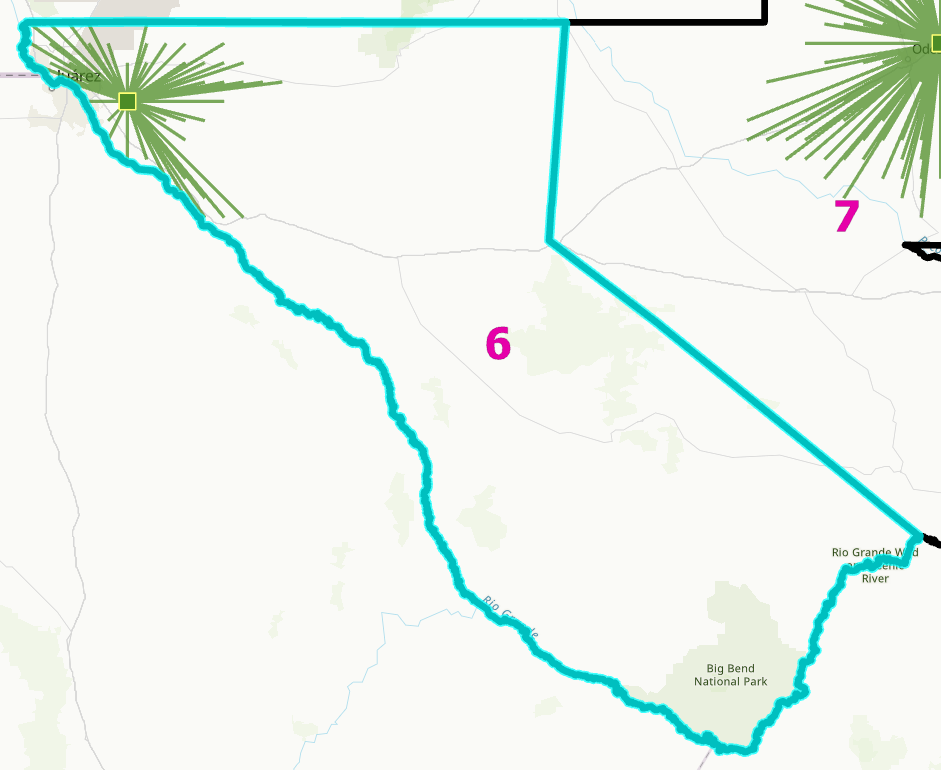


Figure A-6: TCEQ region 6, 500/1,000/1,500 tpd facility scenarios, 1 candidate


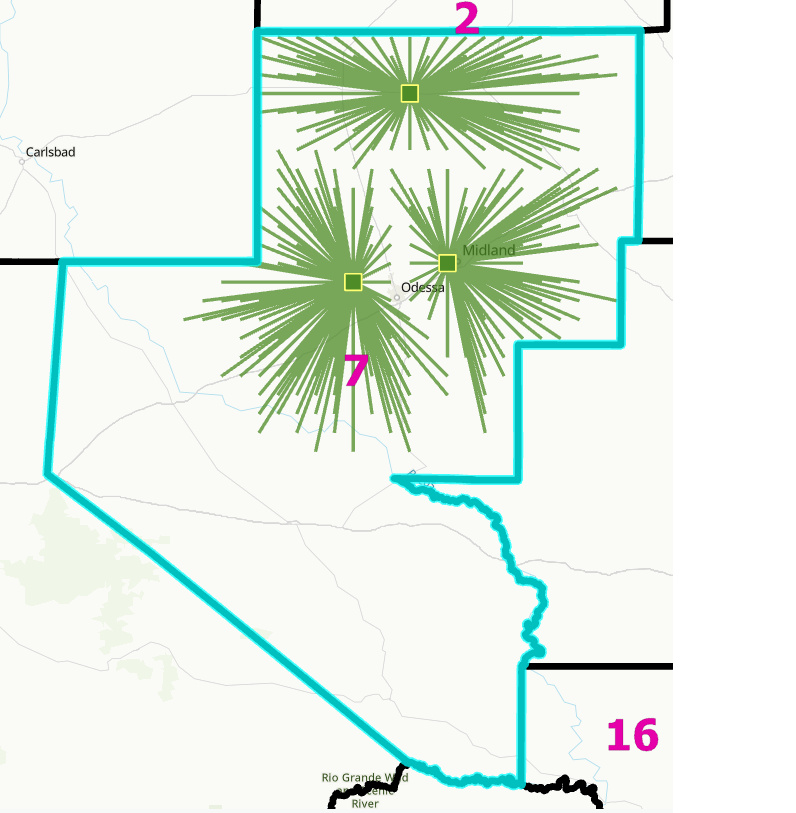


Figure A-7a: TCEQ region 7, 500 tpd facility scenario, 3 candidates


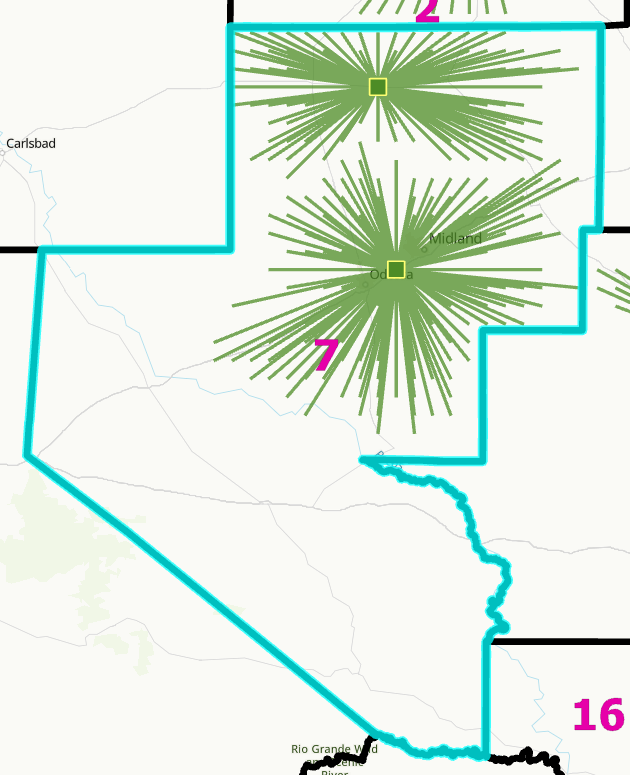


Figure A-7b: TCEQ region 7, 1,000 tpd facility scenario, 2 candidates


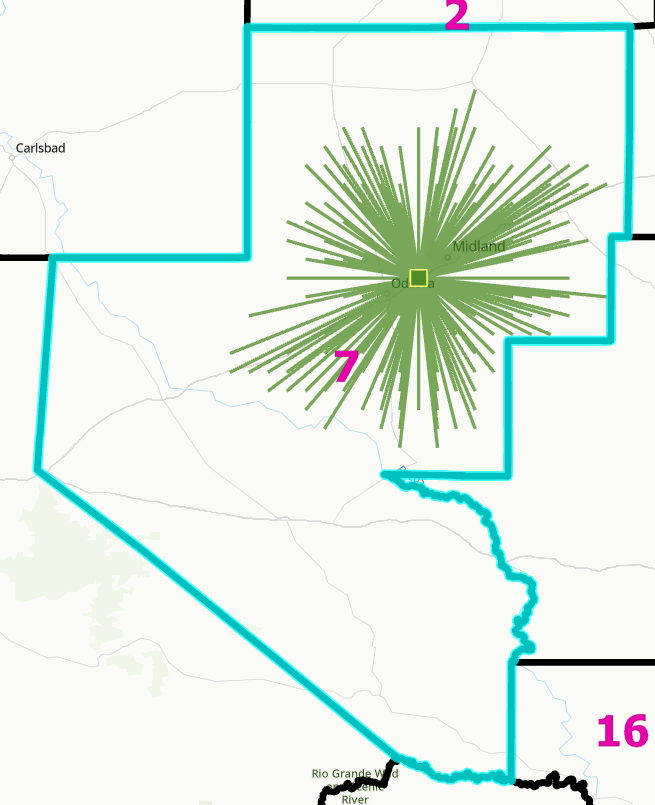


Figure A-7c: TCEQ region 7, 1,500 tpd facility scenario, 1 candidate


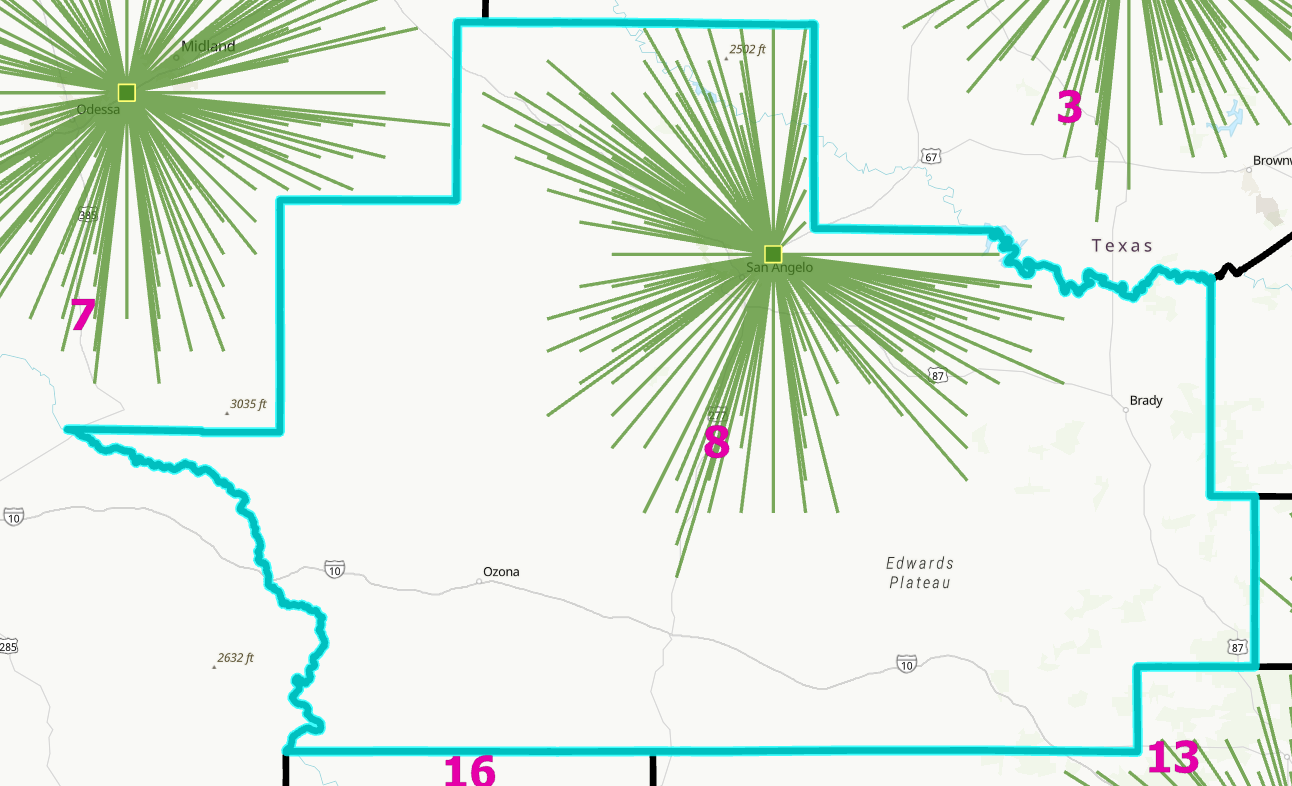


Figure A-8: TCEQ region 8, 500/1,000/1,500 tpd facility scenarios, 1 candidate


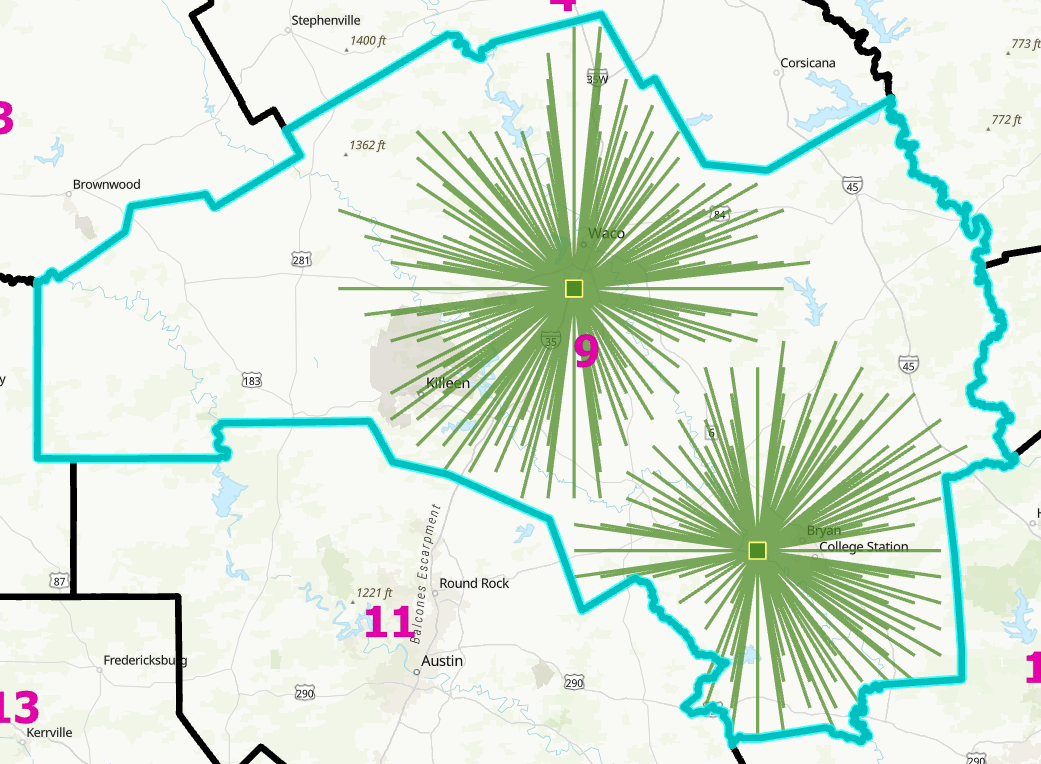


Figure A-9a: TCEQ region 9, 500 ton per day facility scenario, 2 candidates


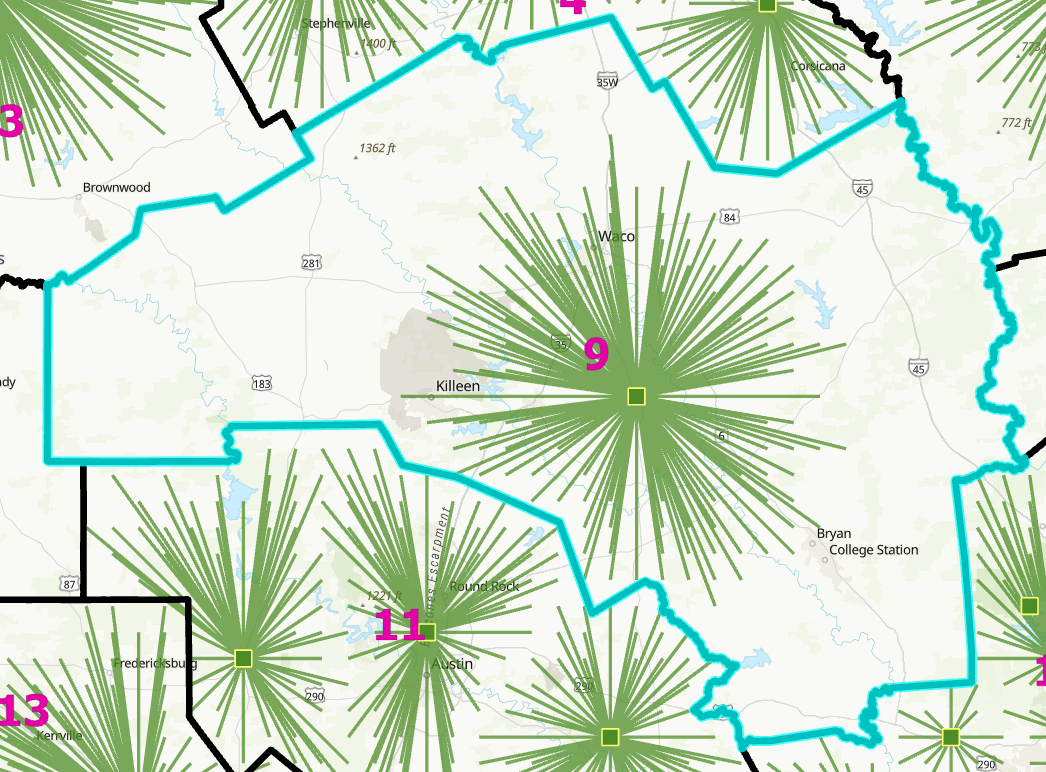


Figure A-9b: TCEQ region 9, 1,000/1,500 tpd facility scenarios, 1 candidate


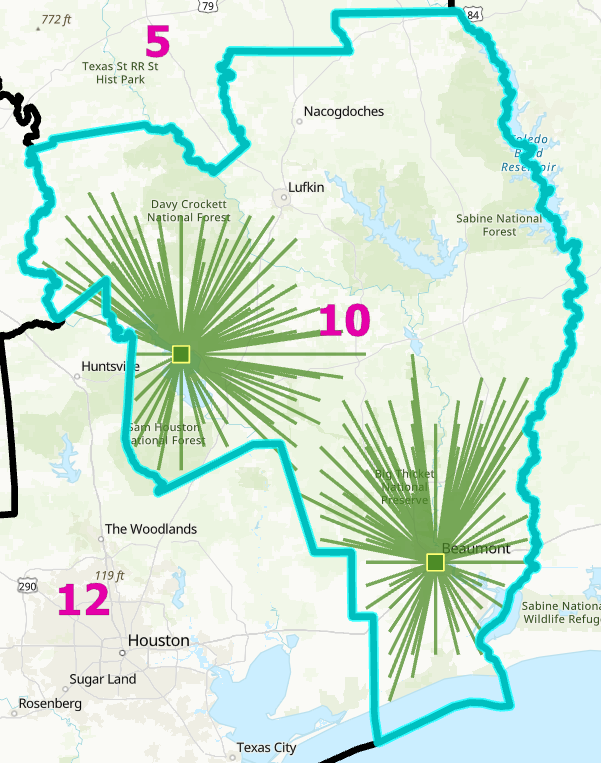


Figure A-10a: TCEQ region 10, 500 tpd facility scenario, 2 candidates


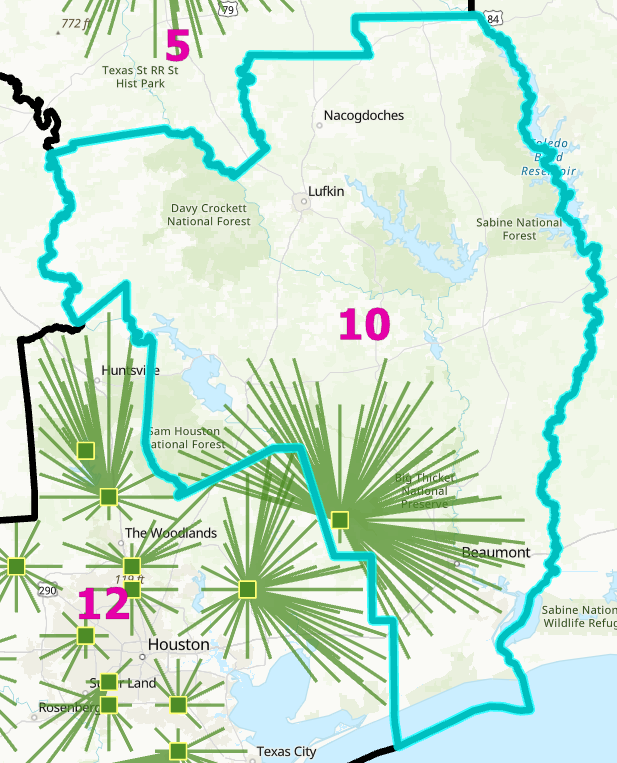


Figure A-10b: TCEQ region 10, 1,000/1,500 tpd facility scenarios, 1 candidate


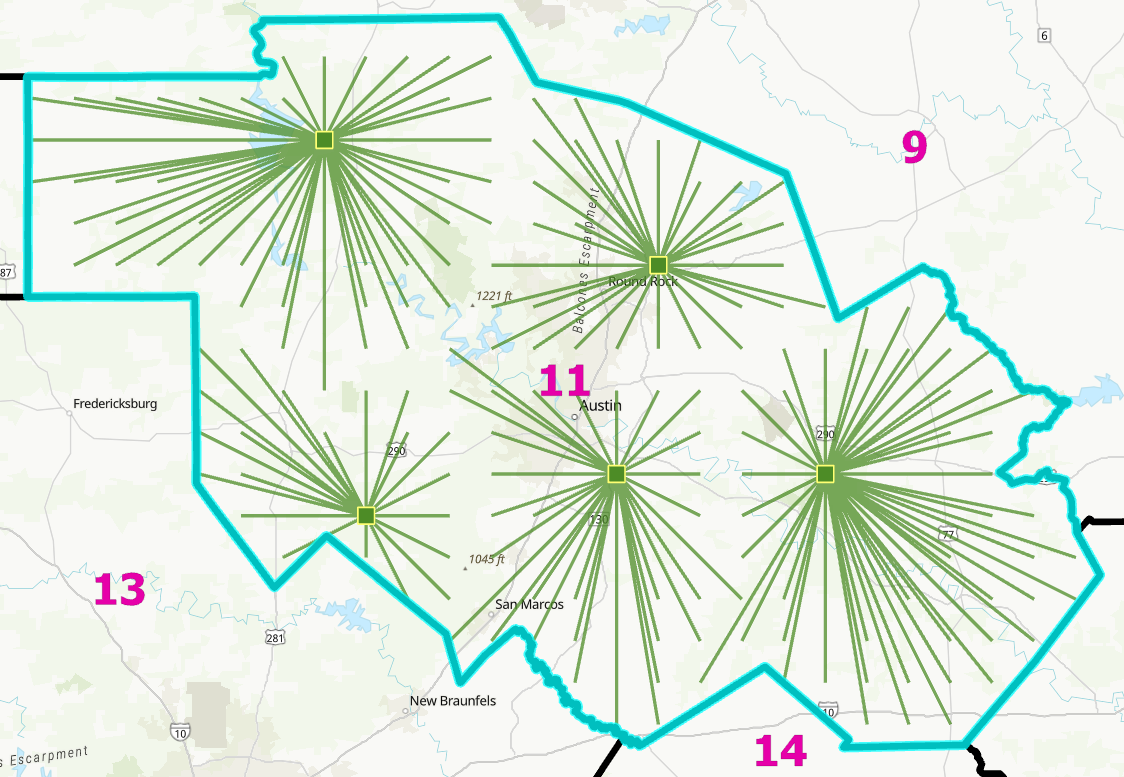


Figure A-11a: TCEQ region 11, 500 tpd facility scenario, 5 candidates


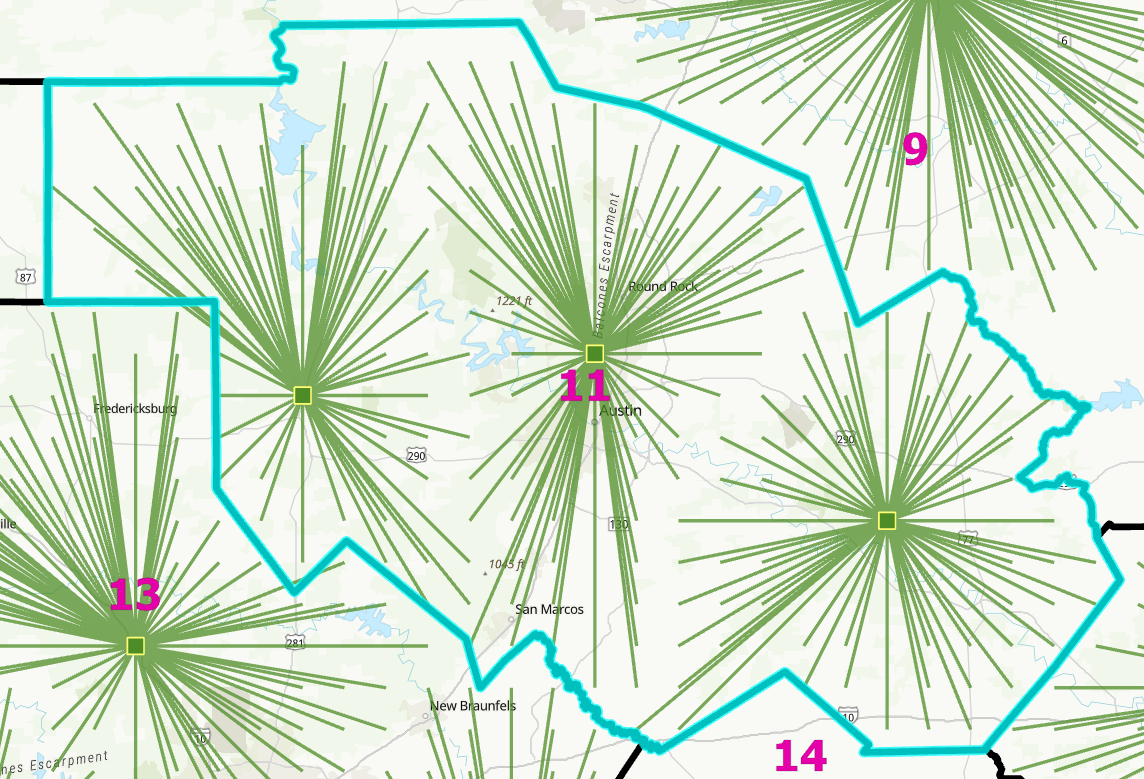


Figure A-11b: TCEQ region 11, 1,000 tpd facility scenario, 3 candidates


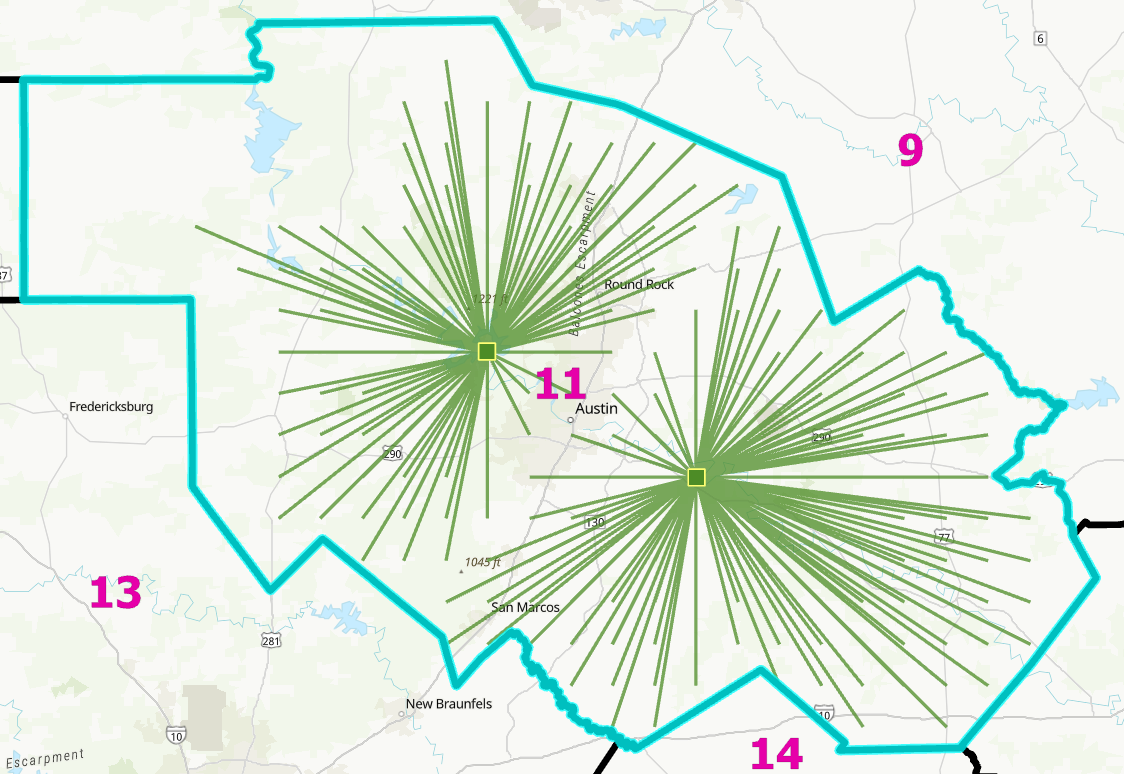


Figure A-11c: TCEQ region 11, 1,500 tpd facility scenario, 2 candidates


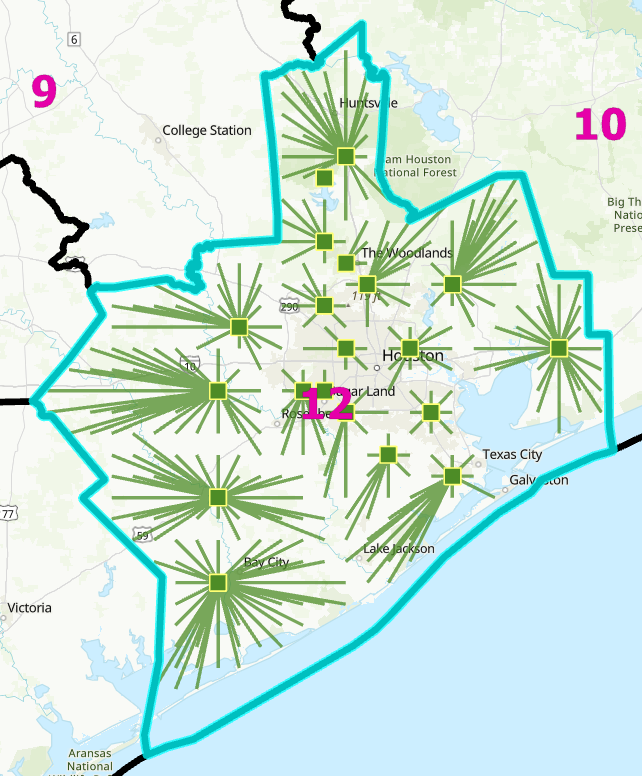


Figure A-12a: TCEQ region 12, 500 tpd facility scenario, 20 candidates


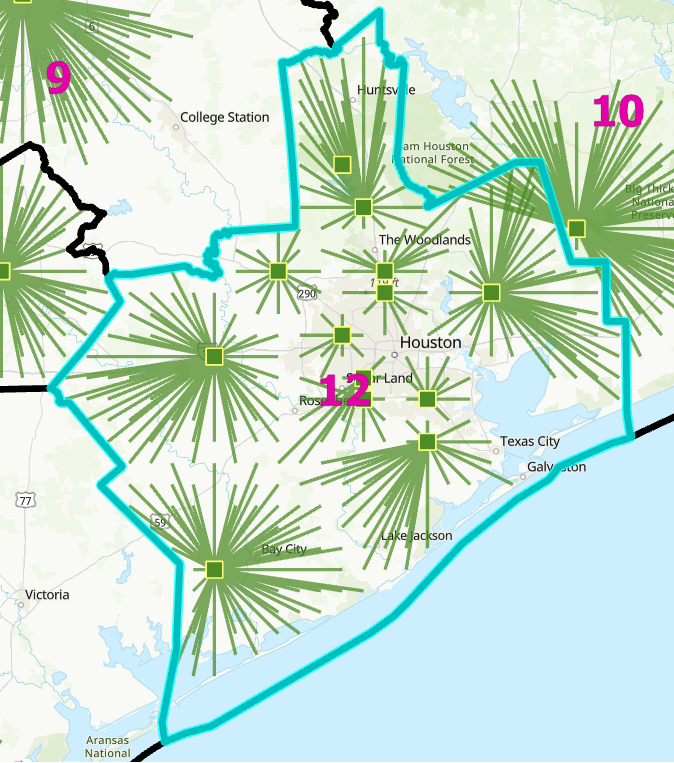


Figure A-12b: TCEQ region 12, 1,000 tpd facility scenario, 13 candidates


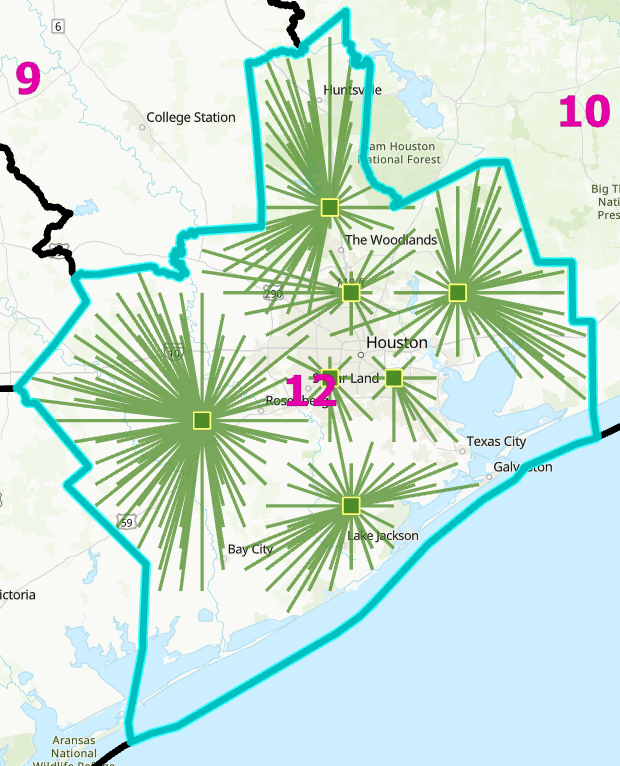


Figure A-12c: TCEQ region 12, 1,500 tpd facility scenario, 7 candidates


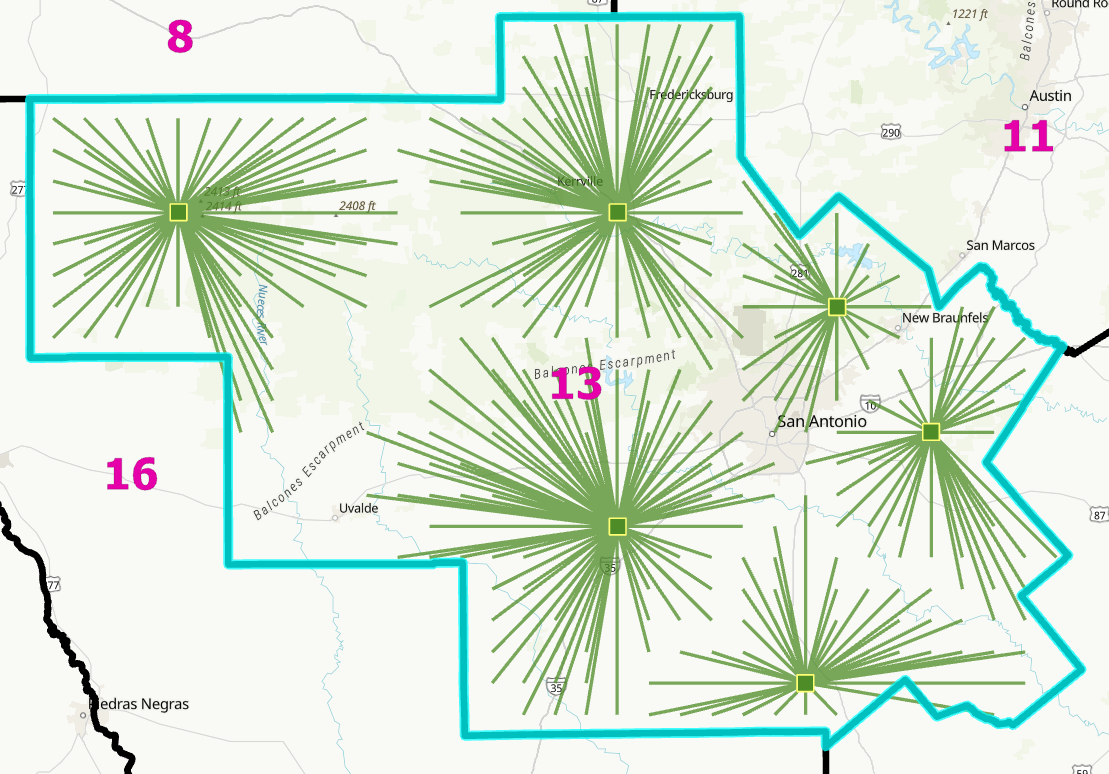


Figure A-13a: TCEQ region 13, 500 tpd facility scenario, 6 candidates


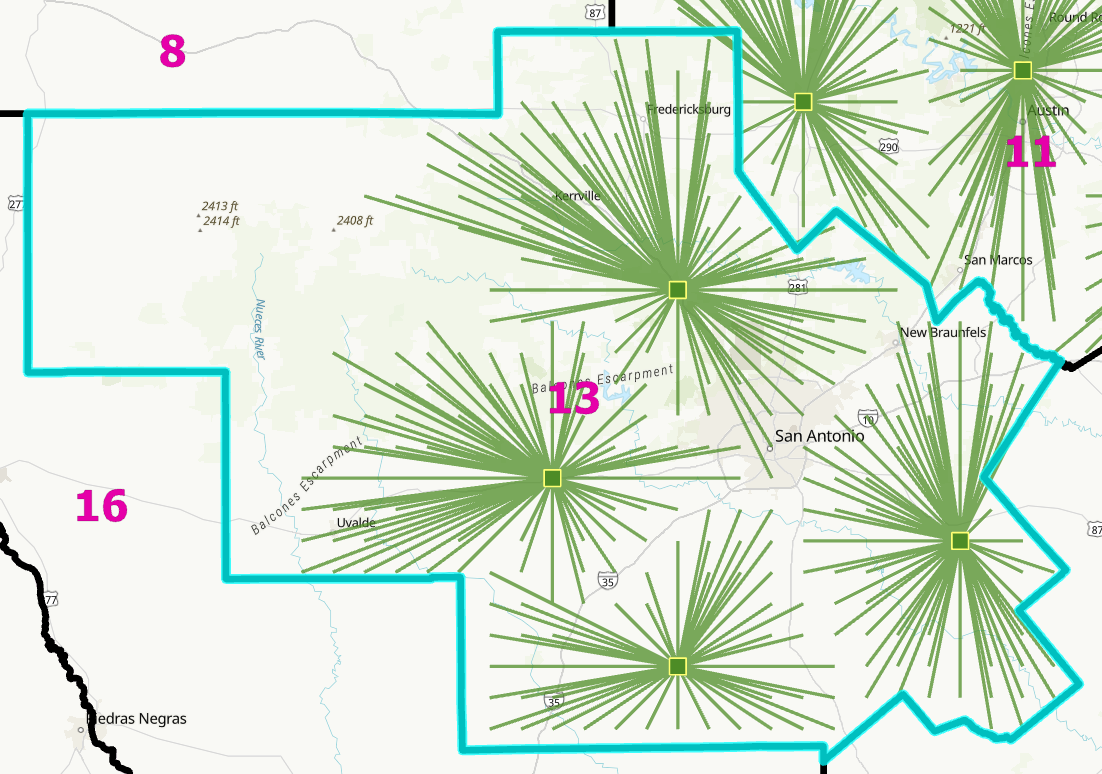


Figure A-13b: TCEQ region 13, 1,000 tpd facility scenario, 4 candidates


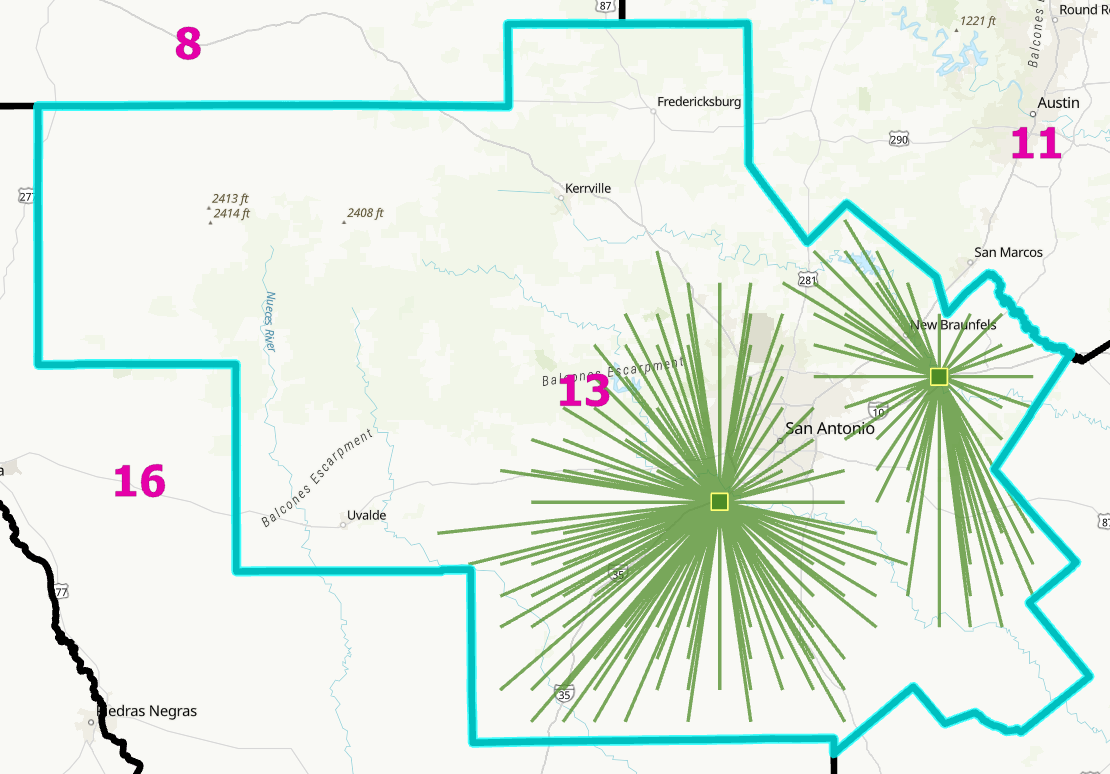


Figure A-13c: TCEQ region 13, 1,500 tpd facility scenario, 2 candidates


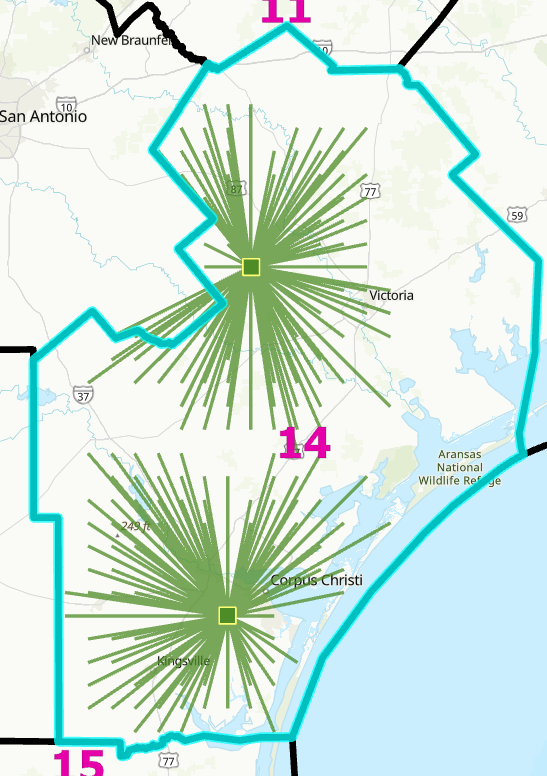


Figure A-14a: TCEQ region 14, 500 tpd facility scenario, 2 candidates


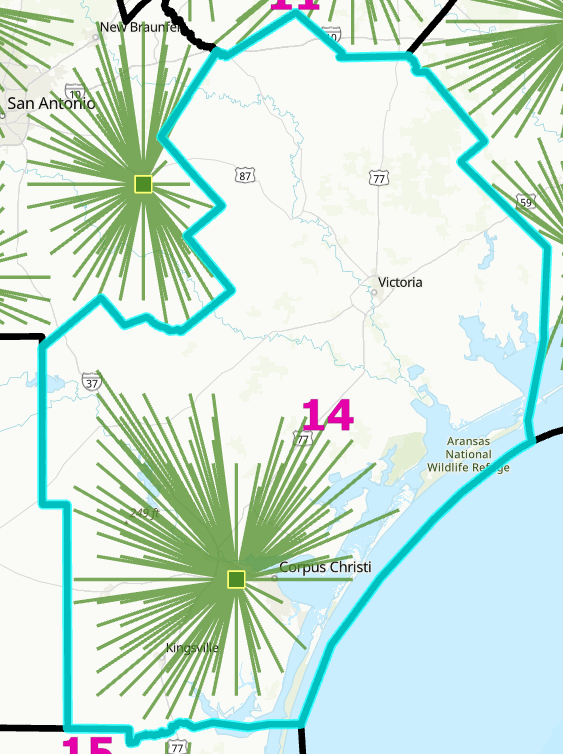


Figure A-14b: TCEQ region 14, 1,000/1,500 tpd facility scenarios, 1 candidate


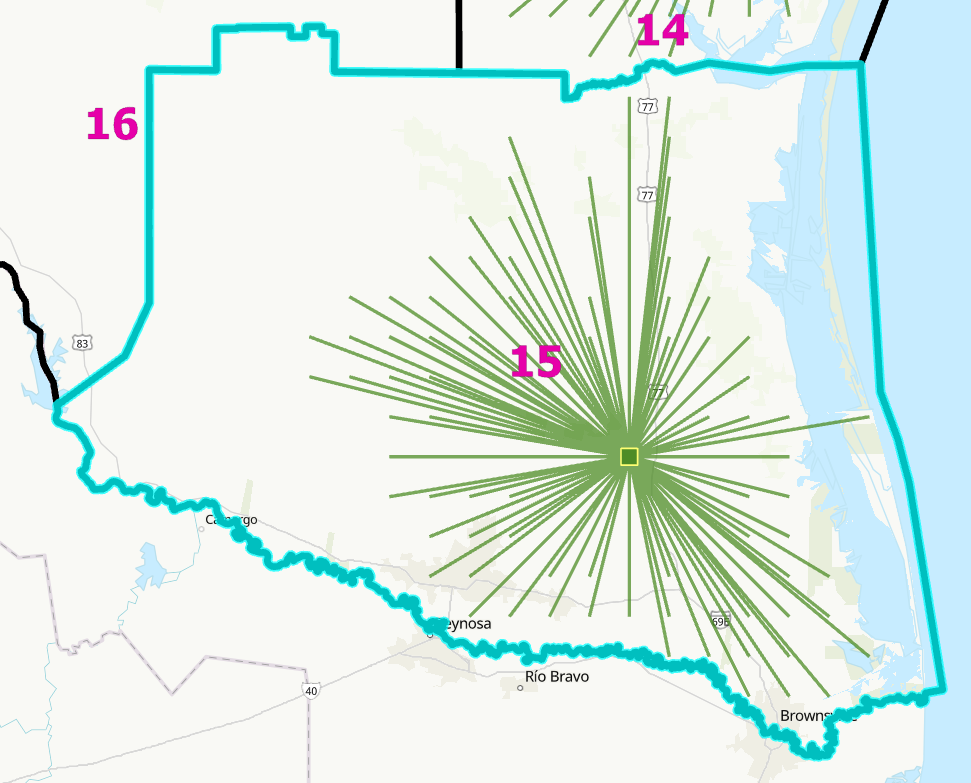


Figure A-15: TCEQ region 15, 500/1,000/1,500 tpd facility scenarios, 1 candidate


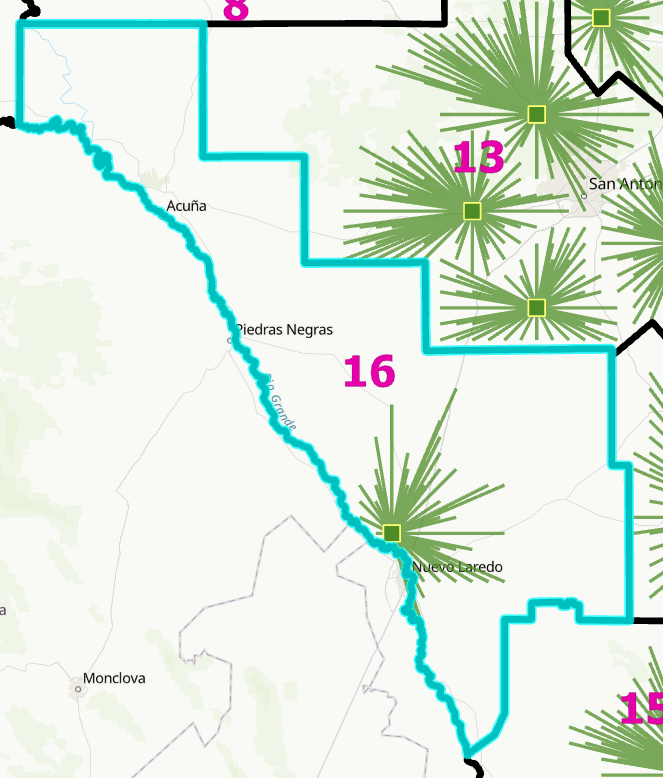


Figure A-16: TCEQ region 16, 500/1,000/1,500 tpd facility scenarios, 1 candidate

**Table A1: Proposed scenario facility capacity and coordinates (in decimal degree WGS 1984)**

| Region | Proposed Number of Recycling Facility | Facility Capacity (stpd/mtpd) | X coordinate | Y coordinate |
| --- | --- | --- | --- | --- |
| 02 | 1 | 1,000/907.2 | -101.84459 | 33.639 |
| 04 | 1 | 1,500/1,360.8 | -97.836401 | 32.54631 |
| 04 | 2 | 1,500/1,360.8 | -96.81017 | 32.54615 |
| 04 | 3 | 1,500/1,360.8 | -96.623322 | 32.70252 |
| 04 | 4 | 1,500/1,360.8 | -96.90333 | 32.93795 |
| 04 | 5 | 1,500/1,360.8 | -97.27351 | 33.09307 |
| 04 | 6 | 1,500/1,360.8 | -96.530938 | 33.63698 |
| 07 | 1 | 1,000/907.2 | -102.21749 | 31.91525 |
| 09 | 1 | 1,000/907.2 | -96.993523 | 31.12208 |
| 10 | 1 | 500/453.6 | -94.106658 | 30.07685 |
| 10 | 2 | 500/453.6 | -95.135052 | 30.80789 |
| 11 | 1 | 1,500/1,360.8 | -94.106658 | 30.07685 |
| 11 | 2 | 1,500/1,360.8 | -95.135052 | 30.80789 |
| 12 | 1 | 1,500/1,360.8 | -95.411765 | 29.18504 |
| 12 | 2 | 1,500/1,360.8 | -96.06531 | 29.50845 |
| 12 | 3 | 1,500/1,360.8 | -95.504997 | 29.67247 |
| 12 | 4 | 1,500/1,360.8 | -95.225319 | 29.67254 |
| 12 | 5 | 1,500/1,360.8 | -95.411773 | 29.99655 |
| 12 | 6 | 1,500/1,360.8 | -94.948951 | 30.00037 |
| 12 | 7 | 1,500/1,360.8 | -95.505024 | 30.31835 |
| 13 | 1 | 1,000/907.2 | -98.68034 | 29.26971 |
| 13 | 2 | 1,000/907.2 | -98.022125 | 29.59026 |
| 14 | 1 | 500/453.6 | -97.555884 | 27.7844 |


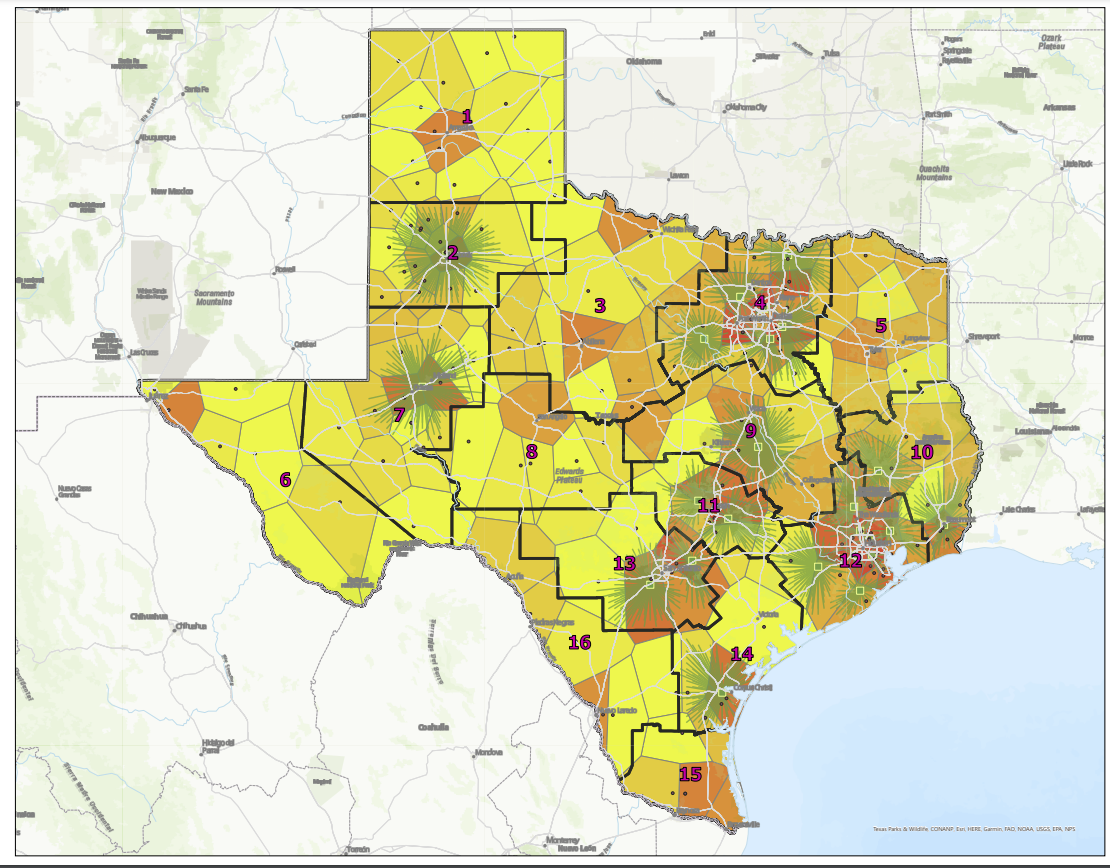


**Figure 9:** The optimized 23-facility siting scenario, showing facility placement and service areas. Waste density depicted by Thiessen polygon coloration from pale (low density) to dark (high density). Facility location matches estimated regional waste availability.
